# Supplementary material for: Are cosmetics a significant source of PFAS in Europe? product inventories, chemical characterization and emission estimates
Source: Royal Society of Chemistry journal article supplement (doi:10.1039/d2em00123c), 2022-01-01
Supplement: d2em00123c1.pdf [file d2em00123c1.pdf]

1                                    **Supporting information for**

2   **Are cosmetics a significant source of PFAS in Europe?**

3   **Product inventories, chemical characterization and**  
4   **emission estimates**

5 Kerstin Winkens Pütz<sup>1#\*</sup>, Shahla Namazkar<sup>2#\*</sup>, Merle Plassmann<sup>2</sup> and Jonathan P. Benskin<sup>2\*</sup>

6  
7 1 IVL Swedish Environmental Research Institute, Stockholm, Sweden.

8 2 Department of Environmental Science, Stockholm University, Stockholm, Sweden.

9  
10 # K.Winkens Pütz and S. Namazkar contributed equally to this work.

11  
12 \*Corresponding authors:

13 Kerstin.Putz@ivl.se

14 Shahla.Namazkar@aces.su.se

15 Jon.Benskin@aces.su.se

## 17 Contents

|    |           |                                                                                                                   |    |
|----|-----------|-------------------------------------------------------------------------------------------------------------------|----|
| 18 | <b>S1</b> | <b>Cosmetic database and purchased cosmetic samples</b>                                                           | 3  |
| 19 |           | <b>Table S1.</b> Overview of selected versus purchased samples per product category based on the                  |    |
| 20 |           | CosmEthics database..                                                                                             | 5  |
| 21 |           | <b>Table S2.</b> Overview of cosmetic products purchased from different stores in Stockholm (Sweden) in           |    |
| 22 |           | September 2020 for analysis in the present study.                                                                 | 5  |
| 23 | <b>S2</b> | <b>Analytical standards and parameters</b>                                                                        | 9  |
| 24 |           | <b>Standards and reagents</b>                                                                                     | 9  |
| 25 |           | <b>Sample extraction for EOF and targeted PFAS analysis</b>                                                       | 9  |
| 26 |           | <b>TF and EOF instrumental analysis</b>                                                                           | 9  |
| 27 |           | <b>Targeted PFAS analysis (LC-MS/MS)</b>                                                                          | 10 |
| 28 |           | <b>Table S3:</b> PFAS (native and internal standards (IS)) included in this study and mass spectrometer (MS)      |    |
| 29 |           | detection/quantification parameters.                                                                              | 11 |
| 30 |           | <b>Table S4.</b> Mobile phase gradient profile for PFAS measured by LC-MS/MS.                                     | 12 |
| 31 | <b>S3</b> | <b>Emissions</b>                                                                                                  | 13 |
| 32 |           | <b>S3.1 Concentration of PFAS in the cosmetic products</b>                                                        | 13 |
| 33 |           | <b>Table S5.</b> Average ( $\pm$ standard deviation), minimum and maximum of the TF concentration (ng F/g)        |    |
| 34 |           | per product (sub-)category                                                                                        | 15 |
| 35 |           | <b>Table S6.</b> Overall average, minimum and maximum of the EOF concentration (ng F/g) per product               |    |
| 36 |           | category                                                                                                          | 17 |
| 37 |           | <b>Table S7.</b> Overall average, minimum and maximum of the $\Sigma$ PFCA concentration (ng $\Sigma$ PFCA/g) per |    |
| 38 |           | product category.                                                                                                 | 18 |
| 39 |           | <b>S3.2 The total amount of cosmetic products sold per year</b>                                                   | 19 |
| 40 |           | <b>Table S8:</b> Calculated total amount (metric tonnes) of cosmetic products sold per year in 2019 in the        |    |
| 41 |           | EEA                                                                                                               | 20 |
| 42 |           | <b>S3.2.1 Retail Sales Prices and market share per product category</b>                                           | 20 |
| 43 |           | <b>Table S9:</b> EEA cosmetic products market 2019, Retail Sales Prices (RSP including VAT) and market            |    |
| 44 |           | share by product category                                                                                         | 20 |
| 45 |           | <b>S3.2.2 Product price</b>                                                                                       | 20 |
| 46 |           | <b>Table S10:</b> Estimated average product price (Euro) per product category for the emission calculations.      |    |
| 47 |           |                                                                                                                   | 21 |
| 48 |           | <b>S3.2.3 Product size</b>                                                                                        | 21 |
| 49 |           | <b>S3.3 The share of products containing PFAS</b>                                                                 | 23 |
| 50 |           | <b>Table S12:</b> Share of cosmetic products and product versions that contain PFAS (%) based on                  |    |
| 51 |           | CosmEthics sorted according to the Cosmetics Europe categories.                                                   | 23 |

|    |                                                                                                                             |    |
|----|-----------------------------------------------------------------------------------------------------------------------------|----|
| 52 | <b>S3.4 The fraction of PFAS released from cosmetic products</b> .....                                                      | 23 |
| 53 | <b>Table S13:</b> Consumer habits for the removal of cosmetic products and calculated total release into                    |    |
| 54 | wastewater; data based on Kantar TNS (2018) commissioned by Cosmetics Europe <sup>9</sup> .....                             | 24 |
| 55 | <b>Table S14.</b> Release scenarios ( $f_{\text{release}}$ %) of cosmetics into the wastewater for emission calculations in |    |
| 56 | the low, average and high emission scenarios after cosmetic product use .....                                               | 25 |
| 57 | <b>Table S15.</b> Overview of the different parameters and their origin going into the emission calculations,               |    |
| 58 | with the example for TF (other analysis, accordingly, only exchanging the measured concentrations for                       |    |
| 59 | the different product categories, Table S5, S6, S7). .....                                                                  | 27 |
| 60 | <b>Table S17:</b> Values going into the emission calculations for the low emission scenario; example for TF                 |    |
| 61 | (other analysis, accordingly, only exchanging the measured concentrations for the different product                         |    |
| 62 | categories, Table S5, S6, S7). .....                                                                                        | 28 |
| 63 | <b>Table S18:</b> Values going into the emission calculations for the high emission scenario; example for TF                |    |
| 64 | (other analysis. accordingly. only exchanging the measured concentrations for the different product                         |    |
| 65 | categories. Table S5. S6. S7). .....                                                                                        | 29 |
| 66 | <b>S4 Limitations and uncertainties of the study</b> .....                                                                  | 30 |
| 67 | <b>S4.1 Inventory development</b> .....                                                                                     | 30 |
| 68 | <b>S4.2 Product sales estimates</b> .....                                                                                   | 31 |
| 69 | <b>S4.3 Analytical Characterization</b> .....                                                                               | 32 |
| 70 | <b>References</b> .....                                                                                                     | 36 |
| 71 |                                                                                                                             |    |
| 72 |                                                                                                                             |    |
| 73 |                                                                                                                             |    |

## 74 **S1   Cosmetic database and purchased cosmetic samples**

75 CosmEthics was founded in 2013 and its app was launched in 2014. The CosmEthics App provides  
76 users with a traffic light system (suitable/safe product, potential allergen, high concern) following  
77 scanning a cosmetic product's barcode. The basic app is free of charge but can be  
78 upgraded/customised with advanced functions such as searching for specific substance, allergens,  
79 vegan products, etc. Manufacturers, retailers and importers input half of the data regarding  
80 products while consumers contribute the other half via crowdsourcing digital data submissions.  
81 The raw data is sent to the back-office system, which subsequently links the submission to the  
82 scanned barcode. CosmEthics' data processing team then inputs the digital raw data by  
83 transcribing the ingredients on the product label into their database. In emissions where the barcode  
84 does not exist in the database, the app user is asked to take picture of the product and ingredient  
85 list and submit this to the app. Quality checks are conducted as part of the transcription process,  
86 whereby each submission is controlled for input errors and a second quality check is conducted in  
87 the report generation stage.

88 As of 2020, CosmEthics app has been downloaded by more than 300000 EU users since then. In  
89 2020, app users contributed to approximately 60 % of the database input, giving the largest  
90 machine-readable cosmetic ingredient database worldwide, with a product scanning hit rate of  
91 approximately 77 % within the EU.

92 The CosmEthics databased was searched for approx. 190 PFAS/INCI in August 2020. The PFAS-  
93 containing product share in the entire CosmEthics database was 1.4 % and 1.1% considering bar  
94 code information of the products (EU/EEA countries only). The total share of INCI names that  
95 were identified as PFAS was 0.061 % (entire database). Considering the entire database, make-up  
96 consisted of the highest percentage of products with PFAS INCI names (4.1 %), followed by Facial  
97 care products and Male grooming products (each 1.2 %). Baby and children's products had a share  
98 of 0.03 % PFAS containing products and the two main product categories Fragrances and Foot  
99 care, had no products listing a PFAS INCI.

100 The products of the CosmEthics database were even split for some of our analyses into EU/EEA  
101 countries and non-EU/EEA countries based on the barcode starting sequence (i.e. GS1 country  
102 prefix within the EAN-13) of the scanned product (country code). The country code indicates the  
103 country where the manufacturer is registered. As EU/EEA countries in the database extract  
104 counted the barcodes of: Austria, Belgium/Luxembourg, Bulgaria, Croatia, Cyprus, Czech  
105 Republic, Denmark/Faroe Islands/Greenland, Estonia, Finland, France/Monaco, Germany,  
106 Greece, Hungary, Iceland, Ireland, Italy/San Marino/Vatican City, Latvia, Lithuania, Malta,  
107 Netherlands, Norway, Poland, Portugal, Rumania, Slovakia, Slovenia, Spain/Andorra, Sweden.  
108 Note that Lichtenstein was not included as it has the same barcodes as Switzerland (non-EU/EEA  
109 country), which was assumed to have the higher product share.

110 All information on the app and database are received by personal communication with Katariina  
111 Rantanen (2020).<sup>1</sup>

112 **Table S1.** Overview of selected versus purchased samples per product category based on the CosmEthics database. A total of 11 product  
 113 categories exist within the CosmEthics database but no PFAS-containing products were found within the categories “Fragrances” and  
 114 “Foot care”; therefore, these are not shown in this table. Note that product categories shown here are not the same as product categories  
 115 used for emission calculations, which were based on classification from Cosmetics Europe.

|                                                         | Facial care | Mouth | Bath and Body Products | Hair care | Make up | Baby and Children's Products | Male grooming | Hands and Nails | Tanning | sum |
|---------------------------------------------------------|-------------|-------|------------------------|-----------|---------|------------------------------|---------------|-----------------|---------|-----|
| Number of PFAS-containing products per product category | 169         | 1     | 15                     | 6         | 490     | 1                            | 16            | 22              | 3       | 723 |
| Number of intended samples                              | 14          | 1     | 1                      | 1         | 34      | 1                            | 1             | 2               | 1       | 56  |
| Number of purchased samples                             | 13          | 0     | 0                      | 6         | 24      | 0                            | 2             | 0               | 0       | 45  |

116

117 **Table S2.** Overview of cosmetic products purchased from different stores in Stockholm (Sweden) in September 2020 for analysis in  
 118 the present study.

| Sample name (Sub Category)  | Product name                                | Brand/ Company     | Fluorinated Ingredient (PFAS INCI) |
|-----------------------------|---------------------------------------------|--------------------|------------------------------------|
| <b>Decorative Cosmetics</b> |                                             |                    |                                    |
| Blush/Bronzer/Contour 1     | Hot MAMA! Shadow/Blush                      | The Balm cosmetics | PTFE                               |
| Blush/Bronzer/Contour 2     | CINDY-LOU MANIZER AKA "The Con-tour Artist" | The Balm cosmetics | PTFE                               |
| Blush/Bronzer/Contour 3     | FREEDOM SYSTEM Face Blush 25                | INGLOT             | POLYPERFLUOROMETHYLISOPROPYL ETHER |
| Blush/Bronzer/Contour 4     | Lasting Finish Soft Color Blush             | RIMMEL LONDON      | PTFE                               |
| Concealer 1                 | CC C'est Magic anti-redness skin enhancer   | L'Oréal Paris      | PERFLUOROOCTYL TRIETHOXYLANE       |

|                       |                                                                                            |                     |                                                                |
|-----------------------|--------------------------------------------------------------------------------------------|---------------------|----------------------------------------------------------------|
| Concealer 2           | CC+ Color Correcting Full Coverage Cream + Hydrating and Anti-Aging Concealer, Neutral Tan | IT Cosmetics        | PERFLUORODECALIN, PERFLUOROHEXANE, PERFLUOROMETHYLCYCLOPENTANE |
| Eyeliner pen 2        | Crayon Yeux Impact Couleur Tenue 16H* Color Eye Pencil 4                                   | Yves Saint Laurent  | PERFLUORONONYL DIMETHICONE                                     |
| Eye shadow 1          | Eyeshadow Fard à paupières                                                                 | URBAN DECAY         | PTFE                                                           |
| Eye shadow 2          | Eye Color Bar                                                                              | IsaDora             | PTFE                                                           |
| Eye shadow 3          | Smoke Balm                                                                                 | The Balm cosmetics  | PTFE                                                           |
| Eye shadow 4          | Color Sensational                                                                          | MAYBELLINE New York | PTFE                                                           |
| Eye shadow 5          | FREEDOM SYSTEM Eye Shadow Matte NF 298                                                     | INGLOT              | POLYPERFLUOROMETHYLISOPROPYL ETHER                             |
| Eyeliner liquid/gel   | AMC Eyeliner Gel 94                                                                        | INGLOT              | POLYPERFLUOROMETHYLISOPROPYL ETHER                             |
| Foundation/BB Cream 1 | BB C'est Magic BB cream 5 in 1 skin perfecter                                              | L'Oréal Paris       | PERFLUOROOCTYL TRIETHOXSILANE                                  |
| Foundation/BB Cream 2 | Flawless Satin Foundation SPE 20                                                           | SENSAI              | TRIFLUOROPROPYL DIMETHICONOL                                   |
| Foundation/BB Cream 3 | C Super balanced makeup                                                                    | CLINIQUE            | C9-15 FLUOROALCOHOL PHOSPHATE                                  |
| Foundation/BB Cream 4 | Fresh Nude Foundation SPF 15, Sahara Light 030                                             | THE BODY SHOP       | AMMONIUM C6-16<br>PERFLUOROALKYLETHYL PHOSPHATE                |
| Lip liner pen 1       | Crayon Levres 01                                                                           | CLARINS PARIS       | PERFLUORONONYL DIMETHICONE                                     |
| Lip liner pen 2       | Mood Crayon Anger                                                                          | LINDA HALLBERG      | POLYETHYLENE PERFLUORONONYL DIMETHICONE                        |
| Loose powder          | Loose powder                                                                               | INGLOT              | POLYPERFLUOROMETHYLISOPROPYL ETHER                             |
| Mascara               | Chubby Lash Fattening Mascara                                                              | CLINIQUE            | PTFE                                                           |
| Pressed Powder 1      | FREEDOM SYSTEM Pressed Powder round 30                                                     | INGLOT              | POLYPERFLUOROMETHYLISOPROPYL ETHER                             |
| Pressed Powder 2      | Smooth Finish Foundation Powder                                                            | LAURA MERCIER       | POLYPERFLUOROETHOXYMETHOXY<br>DIFLUOROETHYL PEG PHOSPHATE      |
| <b>Hair Care</b>      |                                                                                            |                     |                                                                |
| Hair spray 1          | Blowout Styling & Finishing spray                                                          | Living proof.       | OCTAFLUOROPENTYL METHACRYLATE (OFPMA)                          |
| Hair spray 2          | Superfine Hair Spray fixatifix                                                             | ORIBE               | HYDROFLUOROCARBON 152a                                         |
| Shampoo               | Frizz Shampoo                                                                              | Living proof.       | OCTAFLUOROPENTYL METHACRYLATE (OFPMA)                          |
| Styling cream         | Balm d'Or Heat Styling Shield                                                              | ORIBE               | C4-18 PERFLUOROALKYLETHYL<br>THIOHYDROXYPROPYLTRIMONIUM        |

|                                                       |                                                      |                   |                                                                                                                                                             |
|-------------------------------------------------------|------------------------------------------------------|-------------------|-------------------------------------------------------------------------------------------------------------------------------------------------------------|
|                                                       |                                                      |                   | CHLORIDE                                                                                                                                                    |
| Treatment 1                                           | Prime Style Extender                                 | Living proof.     | OCTAFLUOROPENTYL METHACRYLATE (OPFMA)                                                                                                                       |
| <b>Skin Care</b>                                      |                                                      |                   |                                                                                                                                                             |
| After shave                                           | Ultra Confort Moisturizing Balm Soothing After Shave | Biotherm Homme    | POLYPERFLUOROMETHYLISOPROPYL ETHER                                                                                                                          |
| Anti-age cream 1                                      | Revitalift Night Cream                               | L'Oréal Paris     | ACETYL TRIFLUOROMETHYLPHENYL VALYLGLYCINE                                                                                                                   |
| Anti-age cream 2                                      | Snake serum O2                                       | Rodial            | PERFLUOROHEXANE, PERFLUOROPERHYDROPHENANTHREN, PERFLUORODECALIN                                                                                             |
| Anti-age cream 3                                      | Age Fitness Advanced Toning Anti-aging care          | Biotherm Homme    | POLYPERFLUOROMETHYLISOPROPYL ETHER                                                                                                                          |
| Exfoliator                                            | Scrub & Mask                                         | FILORGA           | PERFLUOROHEXANE, PERFLUORODECALIN, PERFLUOROMETHYLCYCLOPENTANE                                                                                              |
| Eye moisturiser 1                                     | Advanced Génifique Yeux                              | LANCÔME           | PTFE                                                                                                                                                        |
| Eye moisturiser 2                                     | Pep-start Eye Cream                                  | CLINIQUE          | TRIFLUOROACETYL TRIPEPTIDE-2                                                                                                                                |
| Facial moisturiser                                    | Facial Fuel Energizing Moisture Treatment For Men    | Kiehl's           | POLYPERFLUOROMETHYLISOPROPYL ETHER                                                                                                                          |
| Mask 1                                                | Instamud 60-Second Pore refining treatment           | GLAMGLOW          | ETHYL PERFLUOROBUTYL ETHER, ETHYL PERFLUOROISOBUTYL ETHER                                                                                                   |
| Mask 2                                                | Water Drench Hyaluronic Micro-Bubbling Cloud Mask    | PETER THOMAS ROTH | METHYL PERFLUOROBUTYL ETHER, METHYL PERFLUOROISOBUTYL ETHER, PERFLUOROHEXANE, PERFLUOROPERHYDROPHENANTHRENE, PERFLUORODECALIN, PERFLUORODIMETHYLCYCLOHEXANE |
| Mask 3                                                | Bubblesheet Oxygenating Deep Cleanse Mask            | GLAMGLOW          | METHYL PERFLUOROBUTYL ETHER                                                                                                                                 |
| Moisturiser/Face cream 1                              | REVITALIFT Day Cream SPE 30                          | L'Oréal           | ACETYL TRIFLUOROMETHYLPHENYL VALYLGLYCINE                                                                                                                   |
| Moisturiser/Face cream 2                              | Ultra Facial Oil-free Lotion                         | Kiehl's           | POLYPERFLUOROMETHYLISOPROPYL ETHER                                                                                                                          |
| Serum and treatment 1                                 | Beauty Lift Illuminating V-Shaping Serum             | LUMENE            | TRIFLUOROACETYL TRIPEPTIDE-2                                                                                                                                |
| Serum and treatment 2                                 | Blue therapy red algae uplift                        | Biotherm          | ACETYL TRIFLUOROMETHYLPHENYL VALYLGLYCINE                                                                                                                   |
| <b>Blank samples (no PFAS on the ingredient list)</b> |                                                      |                   |                                                                                                                                                             |



|                |                                      |               |   |
|----------------|--------------------------------------|---------------|---|
| Eyeliner pen 1 | Color Essence Eye Pencil (celestial) | H&M           | - |
| Treatment 2    | Perfect Hair Day                     | Living proof. | - |

## 120 **S2 Analytical standards and parameters**

### 121 **Standards and reagents**

122 A fluoride standard (1000 mg/L NaF) was obtained from Thermo Scientific and used for  
123 calibration. Certified reference material (BCR<sup>®</sup>-461, fluorine in clay) was obtained from Sigma-  
124 Aldrich. Solvents and reagents used for extraction and analytical procedures were of analytical  
125 grade and purchased as follows: methanol, acetonitrile and ammonium acetate from Merck,  
126 sodium hydroxide, acetic acid and hydrochloric acid (37 %) from Sigma Aldrich. Supelclean<sup>™</sup>  
127 ENVI-Carb<sup>™</sup> powder obtained from Supelco, Sigma Aldrich. Argon and oxygen gases were of  
128 purity grade 5.0 and MilliQ water obtained from Millipore (Merck, TOC of 3 ppb, conductivity of  
129 18.2 MΩ).

### 130 **Sample extraction for EOF and targeted PFAS analysis**

131 Samples analysed for EOF and targeted PFAS were extracted with methanol according to a  
132 procedure previously reported in Schultes et al. (2018). Briefly, sodium hydroxide solution  
133 (NaOH, 0.5 mL of 0.2 M) and methanol (5 mL) were added to a ~0.1 g sample of cosmetic product.  
134 Thereafter, samples were vortexed and ultrasonicated for 30 minutes, at room temperature. The  
135 supernatant was transferred into a new test tube following centrifugation (2000 rpm, 5 minutes).  
136 The extraction was repeated with 5 mL methanol and the extract was centrifuged (3000 rpm, 20  
137 minutes). The supernatants were combined and neutralised with hydrochloric acid (HCl, 50 µL of  
138 2 M). Thereafter, the methanol was evaporated under a gentle stream of nitrogen to approximately  
139 1 mL. About 500 µL of the concentrated extract were transferred to a 1.5 mL Eppendorf tube  
140 containing 25 mg graphitized carbon (Supelclean ENVI-carb) and 50 µL glacial acetic acid. The  
141 tubes were vortexed and centrifuged (10000 rpm, 10 minutes) before transferring the supernatant  
142 to a new Eppendorf tube. At this point, the extract was divided into two portions: about 500 µL  
143 was set aside for EOF analysis. About 100 µL of the extract was spiked with 50 µl of an  
144 isotopically labelled standard solution (20 pg/µL) for target PFAS quantification. 10 % of the  
145 samples were replicated ( $n = 3$ ) and all sample extracts were stored in a freezer until the day of  
146 analysis.

### 147 **TF and EOF instrumental analysis**

148 Approximately 0.1-1 mg of cosmetic product for TF analysis and 10-100 µL of extract for EOF  
149 analysis were weighed into a ceramic boat containing glass wool. To minimize background  
150 contamination, all boats (containing glass wool) were baked out prior to analysis of real samples.  
151 The samples were combusted at 1100°C under a flow of oxygen (400 L/min) and argon mixed  
152 with water vapor (200 L/min) for about 6 minutes. Combustion gases were collected in MilliQ  
153 water in an absorber unit (GA-210, Mitsubishi), after which an aliquot of the absorption solution

154 (100 mL) was injected onto the ion chromatograph (IC; Dionex Integrion, Thermo Fisher  
155 Scientific), which was equipped with an anion exchange column (Dionex IonPac AS19 2 × 50 mm  
156 guard column and 2 × 250 mm analytical column, 7.5 mm particle size) operated at 30°C.  
157 Chromatographic separation was achieved by running a gradient of aqueous hydroxide mobile  
158 phase ramping from 8 mM to 60 mM at a flow rate of 0.25 mL/min. The fluoride was detected by  
159 a conductivity detector.

#### 160 **Targeted PFAS analysis (LC-MS/MS)**

161 Extracts (5 µL) were injected onto an Acquity ultra performance liquid chromatography (UPLC)  
162 (Waters Corp., Milford, MA) equipped with a BEH C18 guard (5×2.1 mm, 1.7 mm particle size)  
163 and an analytical (50×2.1 mm, 1.7 mm) column operated at 40°C. The composition of the mobile  
164 phase and details on the gradient and the flow rate are adopted from Schultes et al. (2018) and can  
165 be found in Table S4. Detection of PFAS was carried out using a Xevo TQ-S triple quadrupole  
166 mass spectrometer (Waters Corp, Milford, MA) operated in negative electrospray ionisation mode.  
167 The capillary voltage was set to 3 kV and the desolvation and source temperature were set to 350°C  
168 and 150°C, respectively. The desolvation and cone gas flows were set to 150 L/h and 650 L/h,  
169 respectively. Further information on MS parameters are presented in Table S3. Quantification of  
170 individual PFAS was performed using MassLynx 4.1 (Waters), via an 8-point calibration curve  
171 ranging from 0.02 to 100 pg/µl. Analytes lacking an analogous labelled standard were quantified  
172 using the internal standard with the closest retention time. In emissions where a sample contained  
173 polyfluoroalkyl phosphate esters (PAPs), a ten-fold fortification of internal standard was  
174 performed and the concentrations were diluted prior to analysis in order to fall within the  
175 uppermost concentration of the calibration curve.

176

177 **Table S3:** PFAS (native and internal standards (IS)) included in this study and mass  
 178 spectrometer (MS) detection/quantification parameters.

| Target Analyte       | Precursor Ion | Quantitative Product ion | Qualitative product ion | Internal standard                     | Internal standard transition |
|----------------------|---------------|--------------------------|-------------------------|---------------------------------------|------------------------------|
| <b>PFBA</b>          | 213           | 169                      | n.a.                    | <sup>13</sup> C <sub>4</sub> -PFBA    | 217>172                      |
| <b>PFPeA</b>         | 263           | 219                      | 169                     | <sup>13</sup> C <sub>5</sub> -PFPeA   | 266>223                      |
| <b>PFHxA</b>         | 313           | 269                      | 119                     | <sup>13</sup> C <sub>2</sub> -PFHxA   | 315>270                      |
| <b>PFHpA</b>         | 363           | 319                      | 169                     | <sup>13</sup> C <sub>4</sub> -PFHpA   | 367>322                      |
| <b>PFOA</b>          | 413           | 169                      | 369                     | <sup>13</sup> C <sub>4</sub> -PFOA    | 417>372                      |
| <b>PFNA</b>          | 463           | 419                      | 219                     | <sup>13</sup> C <sub>5</sub> -PFNA    | 468>423                      |
| <b>PFDA</b>          | 513           | 469                      | 269                     | <sup>13</sup> C <sub>2</sub> -PFDA    | 515>470                      |
| <b>PFUnDA</b>        | 563           | 519                      | 269                     | <sup>13</sup> C <sub>2</sub> -PFUnDA  | 565>520                      |
| <b>PFDoDA</b>        | 613           | 569                      | 169                     | <sup>13</sup> C <sub>2</sub> -PFDoDA  | 615>570                      |
| <b>PFTriDA</b>       | 663           | 619                      | 169                     | <sup>13</sup> C <sub>2</sub> -PFDoDA  | 615>570                      |
| <b>PFTeDA</b>        | 713           | 669                      | 169                     | <sup>13</sup> C <sub>2</sub> -PFDoDA  | 615>570                      |
| <b>PFHxDA</b>        | 813           | 769                      | 169                     | <sup>13</sup> C <sub>2</sub> -PFDoDA  | 615> 570                     |
| <b>PFOcDA</b>        | 913           | 869                      | 169                     | <sup>13</sup> C <sub>2</sub> -PFDoDA  | 615> 570                     |
| <b>PFBS</b>          | 299           | 80                       | 99                      | <sup>18</sup> O <sub>2</sub> -PFHxS   | 403>84                       |
| <b>PFHxS</b>         | 399           | 80                       | 99                      | <sup>18</sup> O <sub>2</sub> -PFHxS   | 403>84                       |
| <b>PFOS</b>          | 499           | 80                       | 99                      | <sup>13</sup> C <sub>4</sub> -PFOS    | 503>80                       |
| <b>PFDS</b>          | 599           | 80                       | 99                      | <sup>13</sup> C <sub>4</sub> -PFOS    | 503>80                       |
| <b>FOSA</b>          | 498           | 78                       | 169                     | <sup>13</sup> C <sub>8</sub> -FOSA    | 506>78                       |
| <b>6:2/6:2 diPAP</b> | 789           | 443                      | 97                      | <sup>13</sup> C <sub>4</sub> -6:2/6:2 | 793>445                      |
| <b>6:2/8:2 diPAP</b> | 889           | 443                      | 543                     | <sup>13</sup> C <sub>4</sub> -6:2/6:2 | 793>445                      |
| <b>8:2/8:2 diPAP</b> | 989           | 543                      | 97                      | <sup>13</sup> C <sub>4</sub> -8:2/8:2 | 993>545                      |

179 *n.a. not applicable*

180 **Table S4.** Mobile phase gradient profile for PFAS measured by LC-MS/MS.

| <b>Time (min)</b> | <b>LC Gradient Program</b> |                           | <b>LC Flow Rate</b> |
|-------------------|----------------------------|---------------------------|---------------------|
|                   | <b>Mobile phase A (%)</b>  | <b>Mobile phase B (%)</b> | <b>(ml/min)</b>     |
| 0.0               | 90                         | 10                        | 0.4                 |
| 0.5               | 90                         | 10                        | 0.4                 |
| 5                 | 20                         | 80                        | 0.4                 |
| 5.1               | 0                          | 100                       | 0.4                 |
| 6.6               | 0                          | 100                       | 0.4                 |
| 8                 | 0                          | 100                       | 0.55                |
| 10                | 90                         | 10                        | 0.4                 |

181 *Mobile phase A: 90 % water and 10 % acetonitrile containing 2 mM ammonium acetate.*

182 *Mobile phase B: 100 % acetonitrile containing 2 mM ammonium acetate.*

## 183 **S3 Emissions**

### 184 **S3.1 Concentration of PFAS in the cosmetic products**

185 Low, average, and high emissions estimates were performed using each of the three analytical  
186 measurements, i.e. total fluorine (TF), extractable organic fluorine (EOF) and targeted PFAS.  
187 Firstly, concentrations were sub-grouped according to the type of cosmetic product. For example,  
188 all samples of eye shadow were considered as one subgroup. Then, the average, minimum and  
189 maximum concentration (i.e. for TF, EOF, or target PFAS) within each subgroup was determined  
190 (Table S5-S7). Finally, the overall average, minimum, and maximum concentration for each  
191 product category (Decorative Cosmetics, Hair Care and Skin Care) was calculated (note that there  
192 were no samples among the product categories “Perfumes and Fragrances” or “Toiletries”) and  
193 used as the product concentration in the emission calculations of the average, low and high  
194 emission scenarios, respectively. For PFCAs, concentrations were summed for each sample prior  
195 to calculating the average, minimum and maximum concentrations.

196 In order to prevent underestimated emissions, concentrations that were below LOD for TF and  
197 EOF measurements were set equal to the actual LOD because at least one PFAS was listed as the  
198 intended ingredient in measured products which in theory can contribute to fluorine amount. While  
199 the concentrations that were below the for  $\sum$ PFCA were set equal to zero to avoid unrealistic  
200 overestimation by taking the actual value of the LOD due to following reasons: (i) none of the  
201 PFCAs was listed as an ingredient (i.e. the measured PFCAs occur as impurities). Thus, they are  
202 unlikely to occur in all products and concentrations are expected to be low; (ii) in emissions where  
203 several PFCA concentrations in a same sample were <LOD, the sum of the LOD concentrations  
204 would result in an overestimate for the emissions calculation (LOD depends on the method and  
205 the instrument of the measurement); (iii) the minimum, average and maximum  $\sum$ PFCA  
206 concentration per product category (which in the extreme emission would be equal to the  $\sum$ LOD-  
207 values, if all PFCAs have concentrations <LOD) will be set off against tonnes of products in the  
208 emission calculations. Therefore, even low LOD (ng/g) values (especially their sum) would  
209 contribute greatly to the final calculated emitted  $\sum$ PFCA amounts.

210 Further, hardly any sample concentrations fell below the LOD (for TF only one hair spray and one  
211 mask <LOD; for EOF one eye shadow and one exfoliator <LOD). Therefore, the influence of  
212 assuming zero or taking the LOD values was negligible for the total averages of the cosmetic  
213 product categories. For TF, only within the product category Hair Care, the minimum  
214 concentration was equal to the LOD value of one Hair Spray product and taken as the minimum  
215 concentration for the low emission scenario. For EOF, the value of the LOD was taken as the  
216 minimum concentration for both Skin Care and Decorative Cosmetics in the low emission  
217 scenario.

218 The concentrations were assumed to be equal to zero for “Perfumes and Fragrances” for all  
219 measurements (TF, EOF and PFAS) and emission scenarios because only one in 3637 products  
220 (i.e. 0.027 %) in the “Perfumes and Fragrances” product category contained a listed PFAS as an  
221 ingredient (CosmEthics database).

222

223 **Table S5.** Average ( $\pm$  standard deviation), minimum and maximum of the TF concentration (ng F/g) per product (sub-)category

| Product Category     | Sub-Category            | Measured TF<br>(mg F/g) | LOD<br>(mg F/g) | (Sub-)Category              | Average<br>(mg F/g) | min<br>(mg F/g) | max<br>(mg F/g) |
|----------------------|-------------------------|-------------------------|-----------------|-----------------------------|---------------------|-----------------|-----------------|
|                      |                         |                         |                 | <b>Decorative Cosmetics</b> | 1.77                | 0.02            | 6.01            |
| Decorative Cosmetics | Blush/Bronzer/Contour 1 | 5.14                    | 0.022           | Blush/Bronzer/Contour       | 2.95                | 0.90            | 5.14            |
| Decorative Cosmetics | Blush/Bronzer/Contour 2 | 3.26 $\pm$ 1.76         | 0.012           |                             |                     |                 |                 |
| Decorative Cosmetics | Blush/Bronzer/Contour 3 | 0.90                    | 0.310           |                             |                     |                 |                 |
| Decorative Cosmetics | Blush/Bronzer/Contour 4 | 2.49                    | 0.014           |                             |                     |                 |                 |
| Decorative Cosmetics | Concealer 1             | 0.80                    | 0.002           | Concealer                   | 0.42                | 0.03            | 0.80            |
| Decorative Cosmetics | Concealer 2             | 0.03                    | 0.016           |                             |                     |                 |                 |
| Decorative Cosmetics | Eye liner, pen 2        | 0.17                    | 0.004           |                             | 0.17                | 0.17            | 0.17            |
| Decorative Cosmetics | Eye shadow 1            | 2.21                    | 0.021           | Eye shadow                  | 2.23                | 0.72            | 5.35            |
| Decorative Cosmetics | Eye shadow 2            | 5.35                    | 0.028           |                             |                     |                 |                 |
| Decorative Cosmetics | Eye shadow 3            | 0.72                    | 0.020           |                             |                     |                 |                 |
| Decorative Cosmetics | Eye shadow 4            | 0.99                    | 0.011           |                             |                     |                 |                 |
| Decorative Cosmetics | Eye shadow 5            | 1.90 $\pm$ 1.05         | 0.015           |                             |                     |                 |                 |
| Decorative Cosmetics | Eyeliner liquid/gel     | 0.35                    | 0.028           |                             |                     |                 |                 |
| Decorative Cosmetics | Foundation/BB Cream 1   | 0.02                    | 0.001           | Foundation/BB Cream         | 1.23                | 0.02            | 3.31            |
| Decorative Cosmetics | Foundation/BB Cream 2   | 0.18                    | 0.002           |                             |                     |                 |                 |
| Decorative Cosmetics | Foundation/BB Cream 3   | 1.41                    | 0.042           |                             |                     |                 |                 |
| Decorative Cosmetics | Foundation/BB Cream 4   | 3.31                    | 1.310           |                             |                     |                 |                 |
| Decorative Cosmetics | Lip liner, pen 1        | 0.52                    | 0.010           | Lip liner, pen              | 0.73                | 0.52            | 0.94            |
| Decorative Cosmetics | Lip liner, pen 2        | 0.94                    | 0.004           |                             |                     |                 |                 |
| Decorative Cosmetics | Loose powder            | 6.01                    | 0.028           | Loose powder                | 6.01                | 6.01            | 6.01            |
| Decorative Cosmetics | Mascara                 | 3.54                    | 0.063           | Mascara                     | 3.54                | 3.54            | 3.54            |
| Decorative Cosmetics | Pressed Powder 1        | 0.23 $\pm$ 0.13         | 0.012           | Pressed Powder              | 0.13                | 0.02            | 0.23            |
| Decorative Cosmetics | Pressed Powder 2        | 0.02                    | 0.007           |                             |                     |                 |                 |



|                      |                          |             |        |                        |       |        |       |
|----------------------|--------------------------|-------------|--------|------------------------|-------|--------|-------|
|                      |                          |             |        | Hair Care              | 0.19  | 0.0012 | 0.50  |
| Hair Care            | Hair spray 1             | 0.01        | 0.0003 | Hair spray             | 0.01  | 0.0012 | 0.01  |
| Hair Care            | Hair spray 2             | <LOD        | 0.0012 |                        |       |        |       |
| Hair Care            | Shampoo                  | 0.50        | 0.231  | Shampoo                | 0.50  | 0.50   | 0.50  |
| Hair Care            | Styling cream            | 0.20        | 0.011  | Styling cream          | 0.20  | 0.20   | 0.20  |
| Hair Care            | Treatment 1              | 0.03        | 0.012  | Treatment              | 0.03  | 0.03   | 0.03  |
|                      |                          |             |        | Skin Care              | 3.83  | 0.01   | 13.79 |
| Skin Care            | After shave              | 3.67        | 0.007  | After shave            | 3.67  | 3.67   | 3.67  |
| Skin Care            | Anti-age cream 1         | 0.077±0.023 | 0.019  | Anti-age cream         | 1.35  | 0.08   | 3.80  |
| Skin Care            | Anti-age cream 2         | 0.18        | 0.014  |                        |       |        |       |
| Skin Care            | Anti-age cream 3         | 3.80        | 0.023  |                        |       |        |       |
| Skin Care            | Exfoliator               | 13.80±2.66  | 0.715  | Exfoliator             | 13.79 | 13.79  | 13.79 |
| Skin Care            | Eye moisturiser 1        | 4.24±0.19   | 0.022  | Eye moisturiser        | 2.12  | 0.01   | 4.24  |
| Skin Care            | Eye moisturiser 2        | 0.01        | 0.002  |                        |       |        |       |
| Skin Care            | Mask 1                   | <LOD        | 0.035  | Mask                   | 3.74  | <LOD   | 10.58 |
| Skin Care            | Mask 2                   | 10.60±0.90  | 0.042  |                        |       |        |       |
| Skin Care            | Mask 3                   | 0.60        | 0.038  |                        |       |        |       |
| Skin Care            | Facial moisturizer       | 2.58        | 0.006  | Facial moisturizer     | 2.03  | 0.05   | 3.47  |
| Skin Care            | Moisturiser/Face cream 1 | 0.05        | 0.034  | Moisturiser/Face cream |       |        |       |
| Skin Care            | Moisturiser/Face cream 2 | 3.47±0.26   | 0.074  |                        |       |        |       |
| Skin Care            | Serum and treatment 1    | 0.069±0.027 | 0.001  | Serum and treatment    | 0.08  | 0.07   | 0.10  |
| Skin Care            | Serum and treatment 2    | 0.10        | 0.013  |                        |       |        |       |
| Blank samples        |                          |             |        |                        |       |        |       |
| Decorative Cosmetics | Eye liner, pen 1         | 0.024±0.024 | 0.007  |                        |       |        |       |
| Hair Care            | Treatment 2              | <LOD        | 0.033  |                        |       |        |       |

224 LOD=limit of detection.

225 Note: "Facial moisturizer" (name of a male product sub-category) falling under the "Male grooming" product category in CosmEthics has been  
226 pooled with the female according products (Moisturiser/Face cream, falling under "Facial Care" as a product category in CosmEthics), as these  
227 both would fall under Skin Care in Cosmetics Europe.

228 **Table S6.** Overall average, minimum and maximum of the EOF concentration (ng F/g) per  
 229 product category

| Product category     | Sub Category          | Measured EOF (ng F/g) | LOD (ng F/g) | (Sub)Category               | Average (ng F/g) | min (ng F/g) | max (ng F/g)   |
|----------------------|-----------------------|-----------------------|--------------|-----------------------------|------------------|--------------|----------------|
|                      |                       |                       |              | <b>Decorative Cosmetics</b> | <b>549516</b>    | <b>325</b>   | <b>4925752</b> |
| Decorative Cosmetics | Concealer 1           | 3912                  | 325          | Concealer                   | 2118             | 325          | 3912           |
| Decorative Cosmetics | Concealer 2           | <MDL                  | 325          |                             |                  |              |                |
| Decorative Cosmetics | Eye liner, pen 2      | 11423                 | 325          | Eye liner, pen              | 11423            | 11423        | 11423          |
| Decorative Cosmetics | Eye shadow 5          | <MDL                  | 325          | Eye shadow                  | 325              | 325          | 325            |
| Decorative Cosmetics | Foundation/BB Cream 3 | 1584131               | 325          | Foundation/BB Cream         | 3254941          | 1584131      | 4925752        |
| Decorative Cosmetics | Foundation/BB Cream 4 | 4925752               | 325          | Foundation/BB Cream         |                  |              |                |
| Decorative Cosmetics | Lip liner, pen 1      | 9417                  | 325          | Lip liner, pen              | 9417             | 9417         | 9417           |
| Decorative Cosmetics | Pressed Powder 2      | 18870                 | 325          | Pressed Powder              | 18870            | 18870        | 18870          |
|                      |                       |                       |              | <b>Hair Care</b>            | <b>102228</b>    | <b>14654</b> | <b>189803</b>  |
| Hair Care            | Shampoo               | 14654                 | 325          | Shampoo                     | 14654            | 14654        | 14654          |
| Hair Care            | Styling cream         | 189803                | 325          | Styling cream               | 189803           | 189803       | 189803         |
|                      |                       |                       |              | <b>Skin Care</b>            | <b>5358</b>      | <b>162</b>   | <b>36583</b>   |
| Skin Care            | After shave           | 374                   | 325          | After shave                 | 374              | 374          | 374            |
| Skin Care            | Anti-age cream 2      | 1258                  | 325          | Anti-age cream              | 1258             | 1258         | 1258           |
| Skin Care            | Exfoliator            | <MDL                  | 162          | Exfoliator                  | 162              | 162          | 162            |
| Skin Care            | Mask 1                | 2695                  | 325          | Mask                        | 19639            | 2695         | 36583          |
| Skin Care            | Mask 2                | 36583.16 (±12199.1)   | 162          |                             |                  |              |                |

230 *LOD=limit of detection.*

231 **Table S7.** Overall average, minimum and maximum of the  $\Sigma$ PFCA concentration (ng  $\Sigma$ PFCA/g)  
 232 per product category

| Product category     | Sub Category          | Measured $\Sigma$ PFCA (ng/g) | (Sub)Category               | Average $\Sigma$ PFCA (ng/g) | min $\Sigma$ PFCA (ng/g) | max $\Sigma$ PFCA (ng/g) |
|----------------------|-----------------------|-------------------------------|-----------------------------|------------------------------|--------------------------|--------------------------|
|                      |                       |                               | <b>Decorative Cosmetics</b> | 51.2                         | 0.00                     | 341                      |
| Decorative Cosmetics | Concealer 1           | 77.4                          | Concealer                   | 38.7                         | 0.00                     | 77.4                     |
| Decorative Cosmetics | Concealer 2           | 0.00                          |                             |                              |                          |                          |
| Decorative Cosmetics | Eye liner, pen 2      | 0.00                          | Eye liner, pen              | 0.00                         | 0.00                     | 0.00                     |
| Decorative Cosmetics | Eye shadow 5          | 10.2                          | Eye shadow                  | 10.2                         | 10.2                     | 10.2                     |
| Decorative Cosmetics | Foundation/BB Cream 3 | 341                           | Foundation/BB Cream         | 252                          | 163                      | 341                      |
| Decorative Cosmetics | Foundation/BB Cream 4 | 163                           |                             |                              |                          |                          |
| Decorative Cosmetics | Lip liner, pen 1      | 5.93                          | Lip liner, pen              | 5.93                         | 5.93                     | 5.93                     |
| Decorative Cosmetics | Pressed Powder 2      | 0.00                          | Pressed Powder              | 0.00                         | 0.00                     | 0.00                     |
|                      |                       |                               | <b>Hair Care</b>            | 0.00                         | 0.00                     | 0.00                     |
| Hair Care            | Shampoo               | 0.00                          | Shampoo                     | 0.00                         | 0.00                     | 0.00                     |
| Hair Care            | Styling cream         | 0.00                          | Styling cream               | 0.00                         | 0.00                     | 0.00                     |
|                      |                       |                               | <b>Skin Care</b>            | 1248                         | 0.00                     | 9559                     |
| Skin Care            | After shave           | 0.00                          | After shave                 | 0.00                         | 0.00                     | 0.00                     |
| Skin Care            | Anti-age cream 2      | 0.00                          | Anti-age cream              | 0.00                         | 0.00                     | 0.00                     |
| Skin Care            | Exfoliator            | 0.00                          | Exfoliator                  | 0.00                         | 0.00                     | 0.00                     |
| Skin Care            | Mask 1                | 425                           | Mask                        | 4992                         | 425                      | 9559                     |
| Skin Care            | Mask 2                | 9559                          |                             |                              |                          |                          |

233 *LOD=limit of detection*

234 *Note: average concentrations equal to zero, if all PFCA concentrations of the  $\Sigma$ PFCA were below the*  
 235 *limit of detection (<LOD).*

### 236 S3.2 The total amount of cosmetic products sold per year

237 To our knowledge, the yearly tonnages of the products within the trading market of interest is not  
238 available.<sup>2-4</sup> Therefore, the yearly tonnage of produced cosmetic products was derived based on  
239 the following data and assumptions:

- 240 • The Retail Sales Price of the European cosmetic products market (Table S9).
- 241 • The market share of the different product categories (Table S8).
- 242 • An assumed average product price per product category (Table S10).
- 243 • An assumed average product size (in g) per product category (Table S11).

244 The two first parameters were obtained from the Cosmetics Europe report<sup>5</sup>. For each product  
245 category the following equation resulted into the total amount of cosmetic products sold per year  
246 ( $A_{products}$ ):

247 **Eq. S1**

$$A_{products} \left[ \frac{t}{year} \right] = \frac{RSP_{market} [Euro] \times f_{market}}{RSP_{product} [Euro]} \times M_{product} [g]$$

248 The number of sold products within each product category was calculated, assuming an average  
249 product price per product category ( $RSP_{product}$  in Euro) and relating this to the Retail Sales Prices  
250 (including VAT) per product category (based on the total market Retail Sales price ( $RSP_{market}$  in  
251 Euro) and the market share ( $f_{market}$ ). The latter two parameters originating from Cosmetics Europe's  
252 the annual report.<sup>5</sup> This has been translated into the tonnage of products produced within each  
253 product category per year in the EEA, in combination with the average product size per product  
254 category ( $M_{product}$  in g).

255 The “product size” and “product price” are sensitive parameters and have a considerable influence  
256 on the data and overall emission. For instance, an increase of all average product sizes by 10 %  
257 would result in a 10 % increase in the total quantity (i.e. mass in t) of products and hence the total  
258 emissions. The estimated tonnage (total volume of 2.64 million tonnes, Norway and Switzerland  
259 data are excluded) agrees well, but are on the lower end of previous estimated amounts of the total  
260 volume of 3-5 million tonnes for the European market (EU28, in 2015).<sup>6</sup>

261 The following sections explain the different parameters in more detail.

262

263 **Table S8:** Calculated total amount (metric tonnes) of cosmetic products sold per year in 2019 in  
 264 the EEA

| Product category         | Estimated total amount of products (thousand tonnes/year in 2019) |
|--------------------------|-------------------------------------------------------------------|
| Skin Care                | 273                                                               |
| Toiletries               | 1110                                                              |
| Hair Care                | 838                                                               |
| Perfumes and Fragrances  | 77.6                                                              |
| Decorative Cosmetics     | 18.8                                                              |
| <b>Total EEA market*</b> | <b>2320</b>                                                       |

265 *\*EU27 and Norway (i.e. EEA without Lichtenstein and Iceland)*

### 266 **S3.2.1 Retail Sales Prices and market share per product category**

267 Table S9 shows Retail Sales Price (EEA) obtained from Cosmetics Europe (2020) on European  
 268 market subtracting the RSP (not include Iceland and Lichtenstein) from the United Kingdom and  
 269 Switzerland. Based on the total Retail Sales Price (EEA) and the market share by product category  
 270 (%), both Cosmetics Europe (2020), the Retail Sales Price per product category was calculated.

271 **Table S9:** EEA cosmetic products market 2019, Retail Sales Prices (RSP including VAT) and  
 272 market share by product category

|                                              | Product category        | Percent (%) | Retail Sales Price (bn Euro) |
|----------------------------------------------|-------------------------|-------------|------------------------------|
| <b>Market share 2019 by product category</b> | Skin Care               | 27.1        | 18.22                        |
|                                              | Toiletries              | 24.8        | 16.67                        |
|                                              | Hair Care               | 18.7        | 12.57                        |
|                                              | Perfumes and Fragrances | 15.4        | 10.35                        |
|                                              | Decorative Cosmetics    | 14          | 9.41                         |
| <b>Total EEA market*</b>                     | all product categories  | 100         | 67.22                        |

273 *\*EU27 and Norway (EEA without Lichtenstein and Iceland)*

### 274 **S3.2.2 Product price**

275 Table S10 shows the average product price per product category in Sweden (assuming 100 SEK  
 276 equal to approximately 10 Euros).

277 Estimation for price was necessary since there was no information available on product prices  
 278 confirmed by personal communications.<sup>2,4</sup> Firstly, the average product price adopted from  
 279 Hansson et al. (2020) in Sweden per product category (assumed 100 SEK, i.e. approximately 10  
 280 Euros as average product price for product categories).<sup>7</sup> Cosmetic products in Sweden are  
 281 generally more expensive than in other EEA countries. Assuming a more expensive product price

will result in a lower number of products sold per product category (because the product price is related to the overall retail sales price) and consequently lower emissions (Eq. 2). Due to this assumption the Swedish prices were taken for the low emission scenario only (Table S10). Perfumes and Fragrances were not considered in the previous report but were assumed to cost 30 Euro per product in the low emission scenario (Table S10). For the average and high emission scenario, the same prices, but lower than in the low emission scenario were assumed. The assumptions were based on personal experience and after screening prices on a webpage of one popular drugstore in Germany (<https://www.dm.de/> beginning of January 2021). The drugstore has a price filter option that lists the number of products in different price categories. The search was done for different sub-product categories (e.g. shampoo, eyeshadow etc.) within the different product categories. However, the frequency of products in the different price categories and for the different sub-categories were not recorded and no mathematical averages were calculated among the products to obtain the average price per product category. Nevertheless, the assumed average prices were based on these insights and after weighing e.g. probable frequently big sellers within the product categories.

**Table S10:** Estimated average product price (Euro) per product category for the emission calculations.

| Product category        | Price (Euro)- for low emission | Price (Euro)- for average emission | Price (Euro)- for high emission |
|-------------------------|--------------------------------|------------------------------------|---------------------------------|
| Decorative Cosmetics    | 10                             | 5                                  | 5                               |
| Hair Care               | 10                             | 3                                  | 3                               |
| Perfumes and Fragrances | 30                             | 10                                 | 10                              |
| Skin Care               | 10                             | 5                                  | 5                               |
| Toiletries              | 10                             | 3                                  | 3                               |

### S3.2.3 Product size

Table S11 shows the average of the product size based on rounded values and assumptions after calculation of the average product size for each sub-category.

No information was available on average product sizes confirmed based on personal communications.<sup>2,4</sup> In order to extract the product size within each product category and sub-category, the CosmEthics database for the PFAS containing products was consulted (both EU/EEA and non-EU/EEA barcode products, 2016-2020 data). However, product size information was missing for many products and sometimes the entire sub-categories.

To address this issue, the sub-categories and size information were classified into the main product categories according to Cosmetics Europe (i.e. Skin Care, Hair Care, Decorative Cosmetics, Perfumes and Fragrances, as well as Toiletries). The product sizes of products in sub-categories that existed in several main product categories were treated as belonging to one sub-category. For

example, in emission of Toiletries, the sub-category Deodorant was considered as an overall sub-category within Cosmetics Europe's for both Bath and Body (female) and Male grooming in CosmEthics product categories. Product sizes given in mL were assumed to be the corresponding size in g (i.e. assumption 1 mL=1 g) and one oz was treated as 30 mL and then accordingly expressed in grams. For products with size information like 5×1.2 g (i.e. products such as eyeshadow pallets containing e.g. 5 different coloured products of each 1.2 g), the actual value was calculated (i.e. 6 g) and given for this product. The average of the product size was calculated for each sub-category. For each of the big five Cosmetics Europe product categories, several averages of the product sizes were calculated (Table S11):

- a) the average [g] over all single products
- b) the average [g] based on the different sub- categories' size averages
- c) the average [g] including all products only in the sub-categories in which samples for chemical analysis existed
- d) the average [g] based on the different sub-categories' size averages in the sampled sub-categories only.

**Table S11:** Average product sizes [g] for the different product categories; final average product size for the emission calculations assumed after considering different averages based on product sizes from the CosmEthics database (PFAS INCI containing products 2016-2020 with listed product size information only) and making assumptions on product sub-categories with missing product size data.

| <b>Product category</b>        | <b>Final average product size [g] for emission calculations</b> | average [g] (over all products with sizes) | average [g] (over the different categories' size averages) | average [g] (including all products in the sampled categories only) | average [g] (over the different categories' size averages in the sampled categories only) | number of products (with PFAS INCI) with product size in the CosmEthics database |
|--------------------------------|-----------------------------------------------------------------|--------------------------------------------|------------------------------------------------------------|---------------------------------------------------------------------|-------------------------------------------------------------------------------------------|----------------------------------------------------------------------------------|
| <b>Decorative Cosmetics</b>    | <b>10</b>                                                       | 13.5                                       | 8.8                                                        | 14.0                                                                | 9.9                                                                                       | 673                                                                              |
| <b>Hair Care</b>               | <b>200</b>                                                      | 189                                        | 166                                                        | 197                                                                 | 171                                                                                       | 79                                                                               |
| <b>Skin Care</b>               | <b>75</b>                                                       | 47.2                                       | 76.8                                                       | 38.6                                                                | 41.9                                                                                      | 181                                                                              |
| <b>Perfumes and Fragrances</b> | <b>75</b>                                                       | 152                                        | 152                                                        |                                                                     |                                                                                           | 1                                                                                |
| <b>Toiletries</b>              | <b>200</b>                                                      | 167                                        | 158                                                        |                                                                     |                                                                                           | 21                                                                               |

331

As some data on size were scarce and sub-categories were over- or underrepresented within some of the categories, assumptions for the product size were made based on calculated averages and weighing the importance of certain product types within categories. Also values were rounded and evened out. As an example, for Toiletries, a larger size (200 g) than the averages were

assumed, as product sizes for body wash were non-existent (presumably a large product size sub-category and popular selling item). The product size of 200 g for Toiletries is also in accordance with a previous assumption.<sup>7,8</sup>

### S3.3 The share of products containing PFAS

Table S12 shows the share of cosmetic products and product versions that contain PFAS (%) sorted according to the Cosmetics Europe categories. The sub-categories from CosmEthics were regrouped into the product categories from Cosmetics Europe. To avoid an overestimation of the emitted PFAS amounts, only the share of the PFAS-containing products within each product category was considered.

**Table S12:** Share of cosmetic products and product versions that contain PFAS (%) based on CosmEthics sorted according to the Cosmetics Europe categories.

| Product category<br>(Cosmetics Europe) | Total number of<br>products and product<br>versions | Total number of cosmetic<br>products and product<br>versions containing PFAS | Share of cosmetic<br>products and product<br>versions containing<br>PFAS (%) |
|----------------------------------------|-----------------------------------------------------|------------------------------------------------------------------------------|------------------------------------------------------------------------------|
| Decorative cosmetics                   | 29118                                               | 1068                                                                         | 3.67                                                                         |
| Hair care                              | 21938                                               | 142                                                                          | 0.65                                                                         |
| Perfumes and<br>Fragrances             | 3637                                                | 1                                                                            | 0.03                                                                         |
| Skin care                              | 40103                                               | 314                                                                          | 0.78                                                                         |
| Toiletries                             | 17844                                               | 49                                                                           | 0.27                                                                         |
| Total                                  | 112639                                              | 1574                                                                         | 1.40                                                                         |

### S3.4 The fraction of PFAS released from cosmetic products

Table S13 shows consumer habits for the removal of cosmetic products and the calculated fraction released into the wastewater (based on Kantar TNS, survey commissioned by Cosmetics Europe among 8000 female and male consumers in eight European countries)<sup>9</sup>. The total released into the wastewater (%) is calculated using equation S2:

**Eq. S2** 
$$WashedOff + ((Cotton, pads, wipes \times Disposed\ into\ toilet) / 100)$$



353 **Table S13:** Consumer habits for the removal of cosmetic products and calculated total release into wastewater; data based on Kantar  
354 TNS (2018) commissioned by Cosmetics Europe<sup>9</sup>

| Product category            | Sub-category             | Washed-off (%) | Cotton, pads, wipes (%) | Other (%) | Cotton etc. disposed into bin (%) | Cotton etc. disposed into toilet (%) | Total release into wastewater (%) |
|-----------------------------|--------------------------|----------------|-------------------------|-----------|-----------------------------------|--------------------------------------|-----------------------------------|
| <b>Decorative Cosmetics</b> | Make-up                  | 24             | 75*                     | 1         | 93                                | 5                                    | 27.8                              |
|                             | Nail varnish/remover     | 15             | 76                      | 9         | 95                                | 4                                    | 18                                |
|                             | Lip stick                | 29             | 69                      | 2         | 94                                | 5                                    | 32.5                              |
|                             | Lip balm                 | 52             | 37                      | 11        | 93                                | 6                                    | 54.2                              |
| <b>Skin Care</b>            | Skin Care                | 75             | 20                      | 5         | 94                                | 4                                    | 75.8                              |
|                             | Sun lotion               | 86             | 13                      | 2         | 93                                | 6                                    | 86.8                              |
| <b>Hair Care</b>            | Hair styling             | 91             | 6                       | 3         | 88                                | 8                                    | 91.5                              |
| <b>Toiletries</b>           | Deodorant/antiperspirant | 89             | 8                       | 3         | 89                                | 8                                    | 89.6                              |

355 \* out of the consumers removing their Makeup with cotton/wipes/tissues (75 %): 48 % remove their makeup with cotton/pads/wipes  
356 only and 27 % use both, cotton/pads/wipes and water.

357

For the cosmetic products fraction released into the wastewater, we considered the total percentage of both, the percentage of the “wash-off” answers and the “cotton/pads/wipes” fraction that were discarded into the toilet. For instance, the Decorative Cosmetic products removal involved (i) using water (i.e. “wash-off”) or (ii) using “cotton, pads, wipes” and/or the alike, or (iii) neither of the first two choices, i.e. “other”. Following the cotton/wipes answer, participants could provide an answer on if these were thrown into the municipal trash or disposed into the toilet (or other).

Table S14 shows release emission scenarios ( $f_{\text{release}}$ ) of cosmetics into the wastewater (after their usage) that are considered for emission calculations in the low, average and high scenario.

**Table S14.** Release scenarios ( $f_{\text{release}}$  %) of cosmetics into the wastewater for emission calculations in the low, average and high emission scenarios after cosmetic product use

| Product category               | Low emission (%) | Average emission (%) | High emission (%) |
|--------------------------------|------------------|----------------------|-------------------|
| <b>Decorative Cosmetics</b>    | 17.8             | 53.4                 | 100               |
| <b>Skin Care</b>               | 65.8             | 75.8                 | 100               |
| <b>Hair Care</b>               | 81.5             | 91.5                 | 100               |
| <b>Toiletries</b>              | 79.6             | 89.6                 | 100               |
| <b>Perfumes and Fragrances</b> | 80               | 90                   | 100               |

\*Percentage of product type emitted to wastewater, expressed as a percentage of total quantity.

In emissions where removal statistics (Table S13) for several product subcategories within one product category were available, the presumably largest and most relevant subcategory’s data were used for the entire product category. No removal statistics were available for Perfumes and Fragrances; therefore, assumptions were made for the different emissions (average emission 90 % release into wastewater, low emission 80 % and high emission 100 %, Table S14). For the average emission scenario of Decorative Cosmetics, all consumers among the ones using cotton, pads and/or wipes (27 % out of 75 %, Table S13), but still washing their face, were counted as purely “wash-off”, i.e. assuming 100 % removal with water (therefore release of 53.4 % in Table S14).

For all low emissions it was assumed that the average emission into wastewater could be lowered by 10 %, i.e. assuming that some of the products are disposed before they are used up and that some fraction of the cosmetic products stays inside the package and is thus disposed into solid waste. For Decorative Cosmetics in the low emission scenario, the consumers using cotton, pads or wipes, but still washing their face, were counted into the statistics as purely cotton, pads and wipe users, i.e. assuming 100 % removal with the aid and no removal by water (27.8 % (Table S13) and removing 10 % as for all other product categories resulted in 17.8 %, Table S14).

For the high emission scenario, the emission to wastewater was assumed to be 100 % for all product categories.

386 PFAS emissions during the production of cosmetic products are not considered in this report.  
387 Furthermore, potential releases of volatile PFAS into the air from the products themselves or the  
388 consumers' body surfaces following the product application were not considered. The volatile  
389 PFAS were rather considered going into wastewater or solid waste, to avoid introducing a great  
390 uncertainty based on several additional unknown parameters for the air emission calculations

391 **Table S15.** Overview of the different parameters and their origin going into the emission calculations, with the example for TF (other  
392 analysis, accordingly, only exchanging the measured concentrations for the different product categories, Table S5, S6, S7).

| Parameter<br>Data<br>origin | Retail Sales<br>Price (bn<br>Euro)                                                                                                                                                                                  | Product<br>price<br>(Euro/pr<br>oduct) | Number of<br>products<br>(bn)                                    | Average<br>product size<br>(g)                                                                                                   | Total<br>weight<br>products<br>(tonnes) | Share of<br>PFAS<br>containin<br>g<br>products<br>(%)                             | TF<br>average/product<br>category (mg/g)<br>equals kg/ton<br>measured                                          | TOTAL<br>Emission TF<br>(kg F/year)<br>EEA<br>Calculated<br>output | Emission<br>fraction<br>to<br>wastewat<br>er (i.e.<br>1=100%)<br>assumptio<br>ns based<br>on<br>consumer<br>removal<br>habits<br>(Kantar<br>TNS/Cos<br>metics<br>Europé) | Emission<br>to<br>wastewater<br>TF (kg<br>F/year)<br>EEA<br>Calculated<br>output | Emission to<br>solid waste<br>TF (kg<br>F/year)<br>EEA<br>Calculated<br>output<br>(total<br>emissions<br>minus<br>emission to<br>wastewater) |
|-----------------------------|---------------------------------------------------------------------------------------------------------------------------------------------------------------------------------------------------------------------|----------------------------------------|------------------------------------------------------------------|----------------------------------------------------------------------------------------------------------------------------------|-----------------------------------------|-----------------------------------------------------------------------------------|----------------------------------------------------------------------------------------------------------------|--------------------------------------------------------------------|--------------------------------------------------------------------------------------------------------------------------------------------------------------------------|----------------------------------------------------------------------------------|----------------------------------------------------------------------------------------------------------------------------------------------|
|                             | Cosmetics<br>Europe<br>Market<br>share and<br>sales<br>price<br>(removing<br>the United<br>Kingdom<br>and<br>Switzerland<br>, i.e. EU 27<br>and<br>Norway, or<br>EEA, but<br>missing<br>Lichtenstein<br>and Iceland | assumpti<br>on of<br>product<br>price  | calculated<br>(based on<br>previous<br>two orange<br>parameters) | assumptions<br>partly based<br>on averages<br>(CosmEthics)<br>, except for<br>Perfumes and<br>Fragrances<br>(only<br>assumption) | calculated                              | from<br>CosmEthic<br>s,<br>regrouped<br>into<br>Cosmetics<br>Europe<br>categories | TF/EOF/PFAS<br>(average, min,<br>max; for<br>Toiletries same<br>concentrations<br>assumed as for<br>Hair Care) |                                                                    |                                                                                                                                                                          |                                                                                  |                                                                                                                                              |

|                                                                   |          |                                                                                                      |                                                     |          |                                                                               |          |                                                         |  |                                                                        |                                                                     |
|-------------------------------------------------------------------|----------|------------------------------------------------------------------------------------------------------|-----------------------------------------------------|----------|-------------------------------------------------------------------------------|----------|---------------------------------------------------------|--|------------------------------------------------------------------------|---------------------------------------------------------------------|
| varying/<br>constant<br>for<br>different<br>emission<br>scenarios | constant | varying<br>between<br>low<br>scenario<br>and the<br>two<br>others<br>(those<br>are<br>identical<br>) | varying,<br>dependent<br>on the<br>product<br>price | constant | varying,<br>dependent<br>on the<br>product<br>price and<br>size of<br>product | constant | varying for each<br>scenario and<br>product<br>category |  | varying<br>for all<br>product<br>categories<br>and in all<br>scenarios | varying for<br>all product<br>categories<br>and in all<br>scenarios |
|-------------------------------------------------------------------|----------|------------------------------------------------------------------------------------------------------|-----------------------------------------------------|----------|-------------------------------------------------------------------------------|----------|---------------------------------------------------------|--|------------------------------------------------------------------------|---------------------------------------------------------------------|

393

394 **Table S17:** Values going into the emission calculations for the low emission scenario; example for TF (other analysis, accordingly,  
395 only exchanging the measured concentrations for the different product categories, Table S5, S6, S7).

| Low emission scenario: Minimal emissions to wastewater (TF minimal value in each product category) |                              |                              |                         |                          |                                |                                       |                                              |                                   |                                               |                                           |                                            |      |
|----------------------------------------------------------------------------------------------------|------------------------------|------------------------------|-------------------------|--------------------------|--------------------------------|---------------------------------------|----------------------------------------------|-----------------------------------|-----------------------------------------------|-------------------------------------------|--------------------------------------------|------|
|                                                                                                    | Retail Sales Price (bn Euro) | Product price (Euro/product) | Number of products (bn) | Average product size (g) | Total weight products (tonnes) | Share of PFAS containing products (%) | TF min/product category (mg/g) equals kg/ton | TOTAL Emission TF (kg F/year) EEA | Emission fraction to wastewater (i.e. 1=100%) | Emission to wastewater TF (kg F/year) EEA | Emission to solid waste TF (kg F/year) EEA |      |
| Skin Care                                                                                          | 18.22                        |                              | 10                      | 1.822                    | 75                             | 136621                                | 0.78                                         | 0.0075                            | 8.02                                          | 0.658                                     | 5.28                                       | 2.74 |
| Toiletries                                                                                         | 16.67                        |                              | 10                      | 1.667                    | 200                            | 333401                                | 0.27                                         | 0.0012                            | 1.04                                          | 0.796                                     | 0.82                                       | 0.21 |
| Hair Care                                                                                          | 12.57                        |                              | 10                      | 1.257                    | 200                            | 251395                                | 0.65                                         | 0.0012                            | 1.88                                          | 0.815                                     | 1.53                                       | 0.35 |
| Perfumes and Fragrances                                                                            | 10.35                        |                              | 30                      | 0.345                    | 75                             | 25879                                 | 0.027                                        | 0                                 | 0                                             | 0.800                                     | 0                                          | 0    |
| Decorative Cosmetics                                                                               | 9.41                         |                              | 10                      | 0.941                    | 10                             | 9411                                  | 3.67                                         | 0.0162                            | 5.61                                          | 0.178                                     | 1.00                                       | 4.61 |
| Total                                                                                              | 67.218                       |                              |                         |                          |                                |                                       |                                              |                                   | 16.55                                         |                                           | 8.63                                       | 7.92 |

396

397

398 **Table S18:** Values going into the emission calculations for the high emission scenario; example for TF (other analysis. accordingly.  
 399 only exchanging the measured concentrations for the different product categories. Table S5. S6. S7).

| High emission scenario: Maximal emissions to wastewater (TF maximal value in each product category) |                              |    |                         |                          |                                |                                       |                                              |                                   |                                               |                                           |                                            |   |
|-----------------------------------------------------------------------------------------------------|------------------------------|----|-------------------------|--------------------------|--------------------------------|---------------------------------------|----------------------------------------------|-----------------------------------|-----------------------------------------------|-------------------------------------------|--------------------------------------------|---|
|                                                                                                     | Retail Sales Price (bn Euro) |    | Number of products (bn) | Average product size (g) | Total weight products (tonnes) | Share of PFAS containing products (%) | TF max/product category (mg/g) equals kg/ton | TOTAL Emission TF (kg F/year) EEA | Emission fraction to wastewater (i.e. 1=100%) | Emission to wastewater TF (kg F/year) EEA | Emission to solid waste TF (kg F/year) EEA |   |
| Skin Care                                                                                           | 18.22                        |    | 5                       | 3.643                    | 75                             | 273241                                | 0.78                                         | 13.785                            | 29381                                         | 1                                         | 29381                                      | 0 |
| Toiletries                                                                                          | 16.67                        |    | 3                       | 5.557                    | 200                            | 1111338                               | 0.27                                         | 0.499                             | 1498                                          | 1                                         | 1498                                       | 0 |
| Hair Care                                                                                           | 12.57                        |    | 3                       | 4.190                    | 200                            | 837984                                | 0.65                                         | 0.499                             | 2718                                          | 1                                         | 2718                                       | 0 |
| Perfumes and Fragrances                                                                             | 10.35                        | 10 | 1.035                   | 75                       | 77637                          | 0.027                                 | 0                                            | 0                                 | 1                                             | 0                                         | 0                                          |   |
| Decorative Cosmetics                                                                                | 9.41                         | 5  | 1.882                   | 10                       | 18821                          | 3.67                                  | 6.006                                        | 4149                              | 1                                             | 4149                                      | 0                                          |   |
| Total                                                                                               | 67.218                       |    |                         |                          |                                |                                       |                                              | 37745                             |                                               | 37745                                     | 0                                          |   |

## S4 Limitations and uncertainties of the study

This study was subject to a number of limitations and uncertainties related to inventory development, product sales estimates, analytical characterization, and emission estimates. These factors are summarized in detail here:

### S4.1 Inventory development

The total number of PFAS occurring in cosmetic products and/or existing as INCI names identified in this report is likely an underestimate for the following reasons:

- One INCI name can include several different PFAS;
- It is unlikely that all PFAS INCI names in CosIng were captured during the database searches. For example, another PFAS INCI name (polyvinylidene difluoride) was found by chance while checking CosIng for the functions in cosmetics of another INCI name (vinylidene difluoride);
- Some ingredient names on the labels of cosmetic products are not part of the CosIng database, i.e. CosIng does not reflect all ingredient names and is therefore not a complete list;
- The PFAS searches within the cosmetic database (CosmEthics) considered the exact PFAS/INCI name from the list, on which the received database extracts in this study are based on. However, typing errors of the ingredient names can occur both on the package labels, or when transferring the ingredient names into the database. Some examples of altered/missing parts of the INCI name on the packaging labels, that were discovered by a database administrator: - INCI “C9-15 fluoroalcohol phosphate” found in the plural wordform, i.e. “C9-15 fluoroalcohol phosphates” on the label; - INCI “Hydrofluorocarbon 152A” found without the “A”, i.e. “Hydrofluorocarbon 152” on the label.

The aforementioned factors have the potential to contribute to an underestimation of the total number of PFAS in cosmetic products. There is also the risk of missing PFAS which occur unintentionally (i.e. as impurities not listed among the ingredients), but which are nevertheless detected by targeted PFAS analysis. At the same time, the products listed in the cosmetic databases reflect the product information as entered into the system, meaning that there could be even an overestimation of PFAS. The below uncertainties could lead to both an over- and underestimation of the number of PFAS in cosmetic products:

- Outdated products, which were either removed from the market or for which ingredients had changed might still be part of the databases, although some CosmEthics is actively updating this information. The targeted sampling showed that some products previously listing PFAS as ingredients did not contain PFAS INCIs anymore.
- The latest products might still be missing in the current database extracts due to missing or too few scans.
- It is unlikely that all products available at the EEA market are in the databases

441 Products in the CosmEthics database were assumed to be representative of the entire EEA market.  
442 However, this is only true in cases where the products are sold in all EEA countries and where  
443 product scans/registrations are not conducted by app users located outside EEA countries.  
444 Producers may have different products in different countries, depending on consumer preferences  
445 (e.g. Nordic countries prefer less perfume than other European countries). When it comes to  
446 cosmetic legislation, there are very few country-specific laws for chemical ingredients (among the  
447 exemptions is Denmark's restriction on parabens), which might influence the ingredient lists.

448

449 While the share of products containing PFAS is considered more certain compared to other  
450 parameters, there are some sources of error which are worth noting.:

- 451 • A slight over- or underestimation of the share of products containing PFAS might arise  
452 from missing PFAS or including replaced products, although it is the best estimate possible  
453 based on the biggest cosmetic database and the different databases seem to match (at least  
454 for the product share over all products);
- 455 • Potentially uncertain, when taking the same current product share in future due to changes  
456 in production/products placed on the market (new database information should be  
457 considered in a few years for emission calculations);
- 458 • A possible underestimation of the product share containing PFAS and the emissions due to  
459 a share of products that contain PFAS as impurities, but that are not listing PFAS as  
460 ingredients;
- 461 • A slight deviation of the product share in the different categories may occur due to  
462 rearrangement of sub-categories from CosmEthics' into Cosmetics Europe's classification  
463 (unlikely to have a big influence at all; also, probably a very minor source of failure,  
464 especially as a terminology and classification list provided by Cosmetics Europe was used  
465 for this)

## 466 **S4.2 Product sales estimates**

467 Ideally the amount or volume of cosmetic products sold per year would exist as a recorded tonnage  
468 value. As this information is not available, several assumptions were made in order to estimate  
469 product sales, which could lead to large differences in emission estimates. The two parameters  
470 with the biggest influence on the cosmetic product amount sold per year are likely the price per  
471 product and the size of a product. A 10 % change in the two parameters would each result in a  
472 corresponding 10 % change in the total emission estimates. The uncertainties that have to be  
473 considered in connection with the total amount of cosmetic products sold per year are as follows:

- 474 • Assumption on an average price per product category (based on estimates and price  
475 screening) might be flawed due to a great price span among and within different product  
476 sub-categories, which also might be of different importance for the overall product  
477 categories;
- 478 • An average price assumption cannot reflect country specific prices, which might vary  
479 greatly and might have a huge influence on the average price, or the related tonnages sold  
480 per country;
- 481 • Assumption on an average size of a product (mL or g) might be flawed due to a great span  
482 among and within different product sub-categories.
- 483 • Products bought outside the EEA and are directly imported by the customers are not  
484 captured by the sales data;



- Retail Sales Price statistics were missing for Lichtenstein and Iceland. thus the EEA emission estimates are just an approximation and are likely a slight underestimation;
- It is assumed that all products sold per year are used during a year;
- Retail Sales Price data do not necessarily reflect the product volume (tonnages). especially over time. i.e. an increase in Retail Sales Price could also show an increase in value of the products.

### S4.3 Analytical Characterization

With regards to characterization of PFAS in cosmetic products. the following uncertainties and limitations were identified:

- The low number of samples analysed compared to the vast number of cosmetic products.
- Missing measurements within the product category “Toiletries” (for which the same concentrations as in “Hair Care” were assumed in the different scenarios) might result in a greater uncertainty of emissions from all cosmetic products.
- Products were not measured from all sub-categories within the different product categories and important sub-categories might be missed out.
- The assumption that all products within the sub-category contain an equal concentration of PFAS as the average/min/max of the measured products may be an oversimplification.
- Emissions estimates based on  $\sum$ PFAS or  $\sum$ PFCA concentrations are likely to be underestimated. because target PFAS analysis only covers a fraction of PFAS which may be present in a product (and in most cases none of the listed PFAS ingredients).
- Emission estimates derived from EOF measurements may be underestimated in products containing polymers and other highly non-polar PFAS. that are not extractable with methanol.
- Inorganic fluorine is expected to occur at low or negligible concentrations relative to organic fluorine (in PFAS-containing products). but it cannot be ruled out that TF emission estimates may be overestimated in cases when large quantities of inorganic fluorine are present.
- A potential underestimation of PFAS as impurities in the share of products not listing PFAS as ingredients. which could increase the share of products containing PFAS (one of the two blank samples not listing any PFAS contained TF); measurement of a wider range of supposedly PFAS-free product could be helpful here.
- A potential underestimation of Perfumes and Fragrances (assumed concentration 0. as so few products contained PFAS(s) as ingredients). if of relevance. likely only for PFAS as impurities.
- Analytical uncertainties. which in comparison to the above mentioned are quantifiable and appear within an acceptable range.

### S4.4 Emission from cosmetic products

- Since emissions during production were not included. overall emissions estimates are likely underestimated.
- PFAS release to other compartments (such as air. while the product is applied) or skin-uptake and ingestion by consumers (the latter especially in the case of lip-products) was considered zero.

- Total emissions of PFAS were split between solid waste and wastewater and were based partly on assumptions. so the emissions might be shifted towards either;
- Statistics for consumer habits on cosmetics' removal were not available for all product categories. for which assumptions had to be made;
- Statistics for consumer habits on cosmetics' removal were paired with assumptions to obtain one value per cosmetic product category only and also for the different emission scenarios;
- Data on product disposal before they are completely used up and on the fraction of the cosmetic product which remains inside the package when used up could improve the emission estimates to wastewater and solid waste; i.e. likely lower the emissions to wastewater and increase the emissions to solid waste (only in the low emission scenario. there was the attempt to account for these additional disposal fractions: by lowering the wastewater fraction by 10 % compared to the average-case scenario and considering this to go into solid waste instead);
- Emissions to wastewater and solid waste might be flawed. as the consumer habits on cosmetics' removal date a few years back. There is an upcoming trend towards multiple-use and washable pads/whips for make-up removal instead of single-use cotton/pads/whips. The multiple-use products are promoted as more environmentally friendly compared to single-use products in terms of saving water/resources during cotton production. However. this ensures that the products are released into the wastewater when washing the reusable pads. In future. consumer habit studies on cosmetic removal should include the use of multiple-use/washable removal products as an additional answer option in questionnaires.

551 **References**

- 552 1 K. Rantanen. *CEO CosmEthics. personal communication.* 2020.  
553 2 J. Chave. *CEO Cosmetics Europe. personal communication.* 2020.  
554 3 J. Liljeteg. *Swedish Medical Products Agency (MPA). personal communication.* 2020.  
555 4 P. Jansson. *Swedish Cosmetics. Toiletries and Detergents Association (KoHF). personal*  
556 *communication.* 2020.  
557 5 Cosmetics Europe. *Market Performance 2019 - European Cosmetic. Toiletry & Perfumery..*  
558 2020.  
559 6 A. Foster Wheeler. *Intentionally added microplastics in products; Doc Ref. 39168 Final Report*  
560 *17271i3.* Environment & Infrastructure UK Limited. Report for European Commission (DG  
561 Environment). 2017.  
562 7 K. Hansson. K. Winkens Pütz. R. Vestergren. Kvantifiering av PFAS emissioner från  
563 kosmetiska produkter. *IVL Swedish Environmental Research Institute.* 2020. 1–20.  
564 8 PM 9/21: PFASs in Cosmetics. *The Swedish Chemicals Agency.* 2021. 113.  
565 9 Kantar TNS. *Consumer habits on removal and disposal of leave on cosmetics products*  
566 *commissioned by Cosmetics Europe for transparency..* 2018.  
567
